# Supplementary material
Source: publisher site journal article supplement (https://www.dovepress.com/article/540213)
Supplement: Supplementary file 1 [file 540213%20Supplementary%20Table%201%20and%20Table%202.pdf]

**Table 1 Annotation of virulence factors in Y148 based on the VFDB database.**

| Jul_22-1685871124 |                   |               |                        |                           |                           |                           |                           |                           |
|-------------------|-------------------|---------------|------------------------|---------------------------|---------------------------|---------------------------|---------------------------|---------------------------|
| VFclass           | Virulence factors | Related genes | Y148<br>(Prediction)   | P.aeruginosa<br>LESB58    | P.aeruginosa<br>PA7       | P.aeruginosa<br>PAO1      | P.fluorescens<br>Pf-5     | P.mendocina<br>ymp        |
|                   |                   |               | contig_1<br>(contig_1) | chromosome<br>(NC_011770) | chromosome<br>(NC_009656) | chromosome<br>(NC_002516) | chromosome<br>(NC_004129) | chromosome<br>(NC_009439) |
|                   |                   | flaG          | -                      | PLES_42281                | PSPA7_4278                | PA1093                    | PFL_1630                  | Pmen_2834                 |
|                   |                   | flaE          | orf05952               | PLES_39591                | PSPA7_3873                | PA1454                    | PFL_1666                  | Pmen_2806                 |
|                   |                   | flaQ          | orf05682               | PLES_42241                | PSPA7_4274                | PA1097                    | PFL_1634                  | Pmen_2829                 |
|                   |                   | flaR          | orf05684               | PLES_42221                | PSPA7_4272                | PA1099                    | PFL_1636                  | Pmen_2827                 |
|                   |                   | flaS          | orf05683               | PLES_42231                | PSPA7_4273                | PA1098                    | PFL_1635                  | Pmen_2828                 |
|                   |                   | flaA          | orf02080               | PLES_17141                | PSPA7_1780                | PA3350                    | PFL_4483                  | Pmen_2853                 |
|                   |                   | flaB          | orf05650               | PLES_42441                | PSPA7_4300                | PA1077                    | PFL_4480                  | Pmen_2850                 |
|                   |                   | flaC          | orf05652               | PLES_42431                | PSPA7_4299                | PA1078                    | PFL_4479                  | Pmen_2849                 |
|                   |                   | flaD          | orf05653               | PLES_42421                | PSPA7_4298                | PA1079                    | PFL_4478                  | Pmen_2848                 |
|                   |                   | flaE          | orf05654               | PLES_42411                | PSPA7_4297                | PA1080                    | PFL_4477                  | Pmen_2847                 |
|                   |                   | flaF          | orf05655               | PLES_42401                | PSPA7_4296                | PA1081                    | PFL_1613                  | Pmen_2846                 |
|                   |                   | flaG          | orf05656               | PLES_42391                | PSPA7_4295                | PA1082                    | PFL_1614                  | Pmen_2845                 |
|                   |                   | flaH          | orf05657               | PLES_42381                | PSPA7_4294                | PA1083                    | PFL_1615                  | Pmen_2844                 |
|                   |                   | flaI          | orf05658               | PLES_42371                | PSPA7_4293                | PA1084                    | PFL_1616                  | Pmen_2843                 |
|                   |                   | flaJ          | orf05659               | PLES_42361                | PSPA7_4292                | PA1085                    | PFL_1617                  | Pmen_2842                 |
|                   |                   | flaK          | orf05660               | PLES_42351                | PSPA7_4291                | PA1086                    | PFL_1618                  | Pmen_2841                 |
|                   |                   | flaL          | orf05661               | PLES_42341                | PSPA7_4290                | PA1087                    | PFL_1619                  | Pmen_2840                 |
|                   |                   | flaM          | orf02081               | PLES_17131                | PSPA7_1779                | PA3351                    | PFL_4484                  | Pmen_2854                 |
|                   |                   | flaN          | orf02082               | PLES_17121                | PSPA7_1778                | PA3352                    | PFL_4485                  | Pmen_2855                 |
|                   |                   | flhA          | orf05950               | PLES_39611                | PSPA7_3875                | PA1452                    | PFL_1664                  | Pmen_2808                 |
|                   |                   | flhB          | orf05947               | PLES_39641                | PSPA7_3878                | PA1449                    | PFL_1654                  | Pmen_2809                 |
|                   |                   | flhF          | orf05951               | PLES_39601                | PSPA7_3874                | PA1453                    | PFL_1665                  | Pmen_2807                 |
|                   |                   | fliA          | orf05953               | PLES_39581                | PSPA7_3872                | PA1455                    | PFL_1667                  | Pmen_2805                 |
|                   |                   | fliC          | orf05675               | PLES_42291                | PSPA7_4279                | PA1092                    | PFL_1629                  | Pmen_2835                 |
|                   |                   | fliD          | orf05677               | PLES_42271                | PSPA7_4277                | PA1094                    | PFL_1631                  | Pmen_2833                 |
|                   |                   | fliE          | orf05685               | PLES_42211                | PSPA7_4271                | PA1100                    | PFL_1637                  | Pmen_2826                 |
|                   |                   | fliF          | orf05686               | PLES_42201                | PSPA7_4270                | PA1101                    | PFL_1638                  | Pmen_2825                 |
|                   |                   | fliG          | orf05687               | PLES_42191                | PSPA7_4269                | PA1102                    | PFL_1639                  | Pmen_2824                 |
|                   |                   | fliH          | orf05688               | PLES_42181                | PSPA7_4268                | PA1103                    | PFL_1640                  | Pmen_2823                 |
|                   |                   | fliI          | orf05689               | PLES_42171                | PSPA7_4267                | PA1104                    | PFL_1641                  | Pmen_2822                 |
|                   |                   | fliJ          | orf05690               | PLES_42161                | PSPA7_4266                | PA1105                    | PFL_1642                  | Pmen_2821                 |
|                   |                   | fliK          | orf05938               | PLES_39721                | PSPA7_3888                | PA1441                    | PFL_1646                  | Pmen_2817                 |

| VFclass   | Virulence factors | Related genes | Y148<br>(Prediction)          | P.aeruginosa<br>LESB58    | P.aeruginosa<br>PA7                                                                     | P.aeruginosa<br>PAO1                                                                                                                                             | P.fluorescens<br>Pf-5                                                                                                                                                                                                                                                     | P.mendocina<br>ymp                                                                                                                                                                        |
|-----------|-------------------|---------------|-------------------------------|---------------------------|-----------------------------------------------------------------------------------------|------------------------------------------------------------------------------------------------------------------------------------------------------------------|---------------------------------------------------------------------------------------------------------------------------------------------------------------------------------------------------------------------------------------------------------------------------|-------------------------------------------------------------------------------------------------------------------------------------------------------------------------------------------|
|           |                   |               | contig_1<br>(contig_1)        | chromosome<br>(NC_011770) | chromosome<br>(NC_009656)                                                               | chromosome<br>(NC_002516)                                                                                                                                        | chromosome<br>(NC_004129)                                                                                                                                                                                                                                                 | chromosome<br>(NC_009439)                                                                                                                                                                 |
| Adherence |                   | fliL          | orf05940                      | PLES_39711                | PSPA7_3885                                                                              | PA1442                                                                                                                                                           | PFL_1647                                                                                                                                                                                                                                                                  | Pmen_2816                                                                                                                                                                                 |
|           |                   | fliM          | orf05941                      | PLES_39701                | PSPA7_3884                                                                              | PA1443                                                                                                                                                           | PFL_1648                                                                                                                                                                                                                                                                  | Pmen_2815                                                                                                                                                                                 |
|           |                   | fliN          | orf05942                      | PLES_39691                | PSPA7_3883                                                                              | PA1444                                                                                                                                                           | PFL_1649                                                                                                                                                                                                                                                                  | Pmen_2814                                                                                                                                                                                 |
|           |                   | fliO          | orf05943                      | PLES_39681                | PSPA7_3882                                                                              | PA1445                                                                                                                                                           | PFL_1650                                                                                                                                                                                                                                                                  | Pmen_2813                                                                                                                                                                                 |
|           |                   | fliP          | orf05944                      | PLES_39671                | PSPA7_3881                                                                              | PA1446                                                                                                                                                           | PFL_1651                                                                                                                                                                                                                                                                  | Pmen_2812                                                                                                                                                                                 |
|           |                   | fliQ          | orf05945                      | PLES_39661                | PSPA7_3880                                                                              | PA1447                                                                                                                                                           | PFL_1652                                                                                                                                                                                                                                                                  | Pmen_2811                                                                                                                                                                                 |
|           |                   | fliR          | orf05946                      | PLES_39651                | PSPA7_3879                                                                              | PA1448                                                                                                                                                           | PFL_1653                                                                                                                                                                                                                                                                  | Pmen_2810                                                                                                                                                                                 |
|           |                   | fliS          | orf05680                      | PLES_42261                | PSPA7_4276*                                                                             | PA1095                                                                                                                                                           | PFL_1632                                                                                                                                                                                                                                                                  | Pmen_2831                                                                                                                                                                                 |
|           |                   | fliT          | orf05681                      | PLES_42251                | PSPA7_4275                                                                              | PA1096                                                                                                                                                           | PFL_1633                                                                                                                                                                                                                                                                  | Pmen_2830                                                                                                                                                                                 |
|           |                   | motA          | orf04400                      | PLES_53401                | PSPA7_5683                                                                              | PA4954                                                                                                                                                           | PFL_0555                                                                                                                                                                                                                                                                  | Pmen_0624                                                                                                                                                                                 |
|           |                   | motB          | orf04401                      | PLES_53391                | PSPA7_5682                                                                              | PA4953                                                                                                                                                           | PFL_0556                                                                                                                                                                                                                                                                  | Pmen_0625                                                                                                                                                                                 |
|           |                   | motC          | orf05958                      | PLES_39531                | PSPA7_3866                                                                              | PA1460                                                                                                                                                           | PFL_1672                                                                                                                                                                                                                                                                  | Pmen_2800                                                                                                                                                                                 |
|           |                   | motD          | orf05959                      | PLES_39521                | PSPA7_3865                                                                              | PA1461                                                                                                                                                           | PFL_1673                                                                                                                                                                                                                                                                  | Pmen_2799                                                                                                                                                                                 |
|           |                   | motY          | orf02242                      | PLES_15071                | PSPA7_1621                                                                              | PA3526                                                                                                                                                           | PFL_4854                                                                                                                                                                                                                                                                  | Pmen_1393                                                                                                                                                                                 |
|           |                   |               | LPS O-antigen (P. aeruginosa) | --                        | orf01872; orf01873;<br>orf01875; orf01876;<br>orf01877; orf01878;<br>orf01879; orf04353 | PLES_19081;<br>PLES_19091;<br>PLES_19101;<br>PLES_19111;<br>PLES_19121;<br>PLES_19131;<br>PLES_19141;<br>PLES_19151;<br>PLES_19161;<br>PLES_19171;<br>PLES_19181 | PSPA7_1969;<br>PSPA7_1970;<br>PSPA7_1971;<br>PSPA7_1972;<br>PSPA7_1973;<br>PSPA7_1974;<br>PSPA7_1975;<br>PSPA7_1976;<br>PSPA7_1977;<br>PSPA7_1978;<br>PSPA7_1979;<br>PSPA7_1980;<br>PSPA7_1981;<br>PSPA7_1982;<br>PSPA7_1983;<br>PSPA7_1984;<br>PSPA7_1985;<br>PSPA7_1986 | PA3141; PA3142;<br>PA3143; PA3144;<br>PA3145; PA3146;<br>PA3147; PA3148;<br>PA3149; PA3150;<br>PA3151; PA3152;<br>PA3153; PA3154;<br>PA3155; PA3156;<br>PA3157; PA3158;<br>PA3159; PA3160 |
|           |                   | fimT          | -                             | PLES_49321                | PSPA7_5189                                                                              | PA4549                                                                                                                                                           | -                                                                                                                                                                                                                                                                         | Pmen_0963                                                                                                                                                                                 |
|           |                   | fimU          | orf04823                      | PLES_49331                | PSPA7_5190                                                                              | PA4550                                                                                                                                                           | -                                                                                                                                                                                                                                                                         | Pmen_0962                                                                                                                                                                                 |
|           |                   | fimV          | orf01846                      | PLES_19441                | PSPA7_2018                                                                              | PA3115                                                                                                                                                           | PFL_2069                                                                                                                                                                                                                                                                  | Pmen_2718                                                                                                                                                                                 |
|           |                   | pilA          | orf04850                      | PLES_49071                | PSPA7_5161                                                                              | PA4525                                                                                                                                                           | PFL_5287                                                                                                                                                                                                                                                                  | Pmen_0777                                                                                                                                                                                 |

| VFclass | Virulence factors                                | Related genes | Y148<br>(Prediction)   | P.aeruginosa<br>LESB58    | P.aeruginosa<br>PA7       | P.aeruginosa<br>PAO1      | P.fluorescens<br>Pf-5     | P.mendocina<br>ymp        |
|---------|--------------------------------------------------|---------------|------------------------|---------------------------|---------------------------|---------------------------|---------------------------|---------------------------|
|         |                                                  |               | contig_1<br>(contig_1) | chromosome<br>(NC_011770) | chromosome<br>(NC_009656) | chromosome<br>(NC_002516) | chromosome<br>(NC_004129) | chromosome<br>(NC_009439) |
|         | Type IV pili biosynthesis                        | pilB          | orf04849               | PLES_49091                | PSPA7_5162                | PA4526                    | -                         | Pmen_0775                 |
|         |                                                  | pilC          | orf04848               | PLES_49101                | PSPA7_5163                | PA4527                    | PFL_5288                  | Pmen_0774                 |
|         |                                                  | pilD          | orf04847               | PLES_49111                | PSPA7_5164                | PA4528                    | PFL_5289                  | Pmen_0773                 |
|         |                                                  | pilE          | orf04818               | PLES_49391                | PSPA7_5196                | PA4556                    | PFL_5311                  | Pmen_0957                 |
|         |                                                  | pilF          | orf02544               | PLES_11691                | PSPA7_1309                | PA3805                    | PFL_4956                  | Pmen_3502                 |
|         |                                                  | pilM          | orf04301               | PLES_54341                | PSPA7_5781                | PA5044                    | PFL_0445                  | Pmen_0542                 |
|         |                                                  | pilN          | orf04302               | PLES_54331                | PSPA7_5780                | PA5043                    | PFL_0446                  | Pmen_0543                 |
|         |                                                  | pilO          | orf04303               | PLES_54321                | PSPA7_5779                | PA5042                    | PFL_0447                  | Pmen_0544                 |
|         |                                                  | pilP          | orf04304               | PLES_54311                | PSPA7_5778                | PA5041                    | PFL_0448                  | Pmen_0545                 |
|         |                                                  | pilQ          | orf04305               | PLES_54301                | PSPA7_5777                | PA5040                    | PFL_0449                  | Pmen_0546                 |
|         |                                                  | pilR          | orf04826               | PLES_49301                | PSPA7_5187                | PA4547                    | PFL_5309                  | Pmen_0965                 |
|         |                                                  | pilS          | orf04827               | PLES_49291                | PSPA7_5186                | PA4546                    | -                         | Pmen_0966                 |
|         |                                                  | pilT          | orf03327               | PLES_03931                | PSPA7_0495                | PA0395                    | PFL_5837                  | Pmen_4149                 |
|         |                                                  | pilU          | orf03326               | PLES_03941                | PSPA7_0496                | PA0396                    | -                         | Pmen_4148                 |
|         |                                                  | pilV          | orf04824               | PLES_49341                | PSPA7_5191                | PA4551                    | -                         | Pmen_0961                 |
|         |                                                  | pilW          | orf04822               | PLES_49351                | PSPA7_5192                | PA4552                    | -                         | Pmen_0960                 |
|         |                                                  | pilX          | orf04821               | PLES_49361                | PSPA7_5193                | PA4553                    | -                         | Pmen_0959                 |
|         | pilY1                                            | orf04820      | PLES_49371             | PSPA7_5194                | PA4554                    | PFL_5312                  | Pmen_0958                 |                           |
|         | pilY2                                            | orf04819      | PLES_49381             | PSPA7_5195                | PA4555                    | -                         | -                         |                           |
|         | pilZ                                             | orf01684      | PLES_21031             | PSPA7_2201                | PA2960                    | -                         | Pmen_1635                 |                           |
|         | Type IV pili twitching motility related proteins | chpA          | orf03309               | PLES_04111                | PSPA7_0513                | PA0413                    | PFL_5823                  | Pmen_0408                 |
|         |                                                  | chpB          | orf03308               | PLES_04121                | PSPA7_0514                | PA0414                    | -                         | Pmen_0409                 |
|         |                                                  | chpC          | orf03307               | PLES_04131                | PSPA7_0515                | PA0415                    | PFL_5822                  | Pmen_0410                 |
|         |                                                  | chpD          | orf03306               | PLES_04141                | PSPA7_0516                | PA0416                    | -                         | -                         |
|         |                                                  | chpE          | orf03305               | PLES_04151                | PSPA7_0517                | PA0417                    | -                         | Pmen_0661                 |
|         |                                                  | pilG          | orf03314               | PLES_04061                | PSPA7_0508                | PA0408                    | PFL_5827                  | Pmen_0403                 |
|         |                                                  | pilH          | orf03313               | PLES_04071                | PSPA7_0509                | PA0409                    | PFL_5826                  | Pmen_0404                 |
| pilI    |                                                  | orf03312      | PLES_04081             | PSPA7_0510                | PA0410                    | PFL_5825                  | Pmen_0405                 |                           |
| pilJ    |                                                  | orf03311      | PLES_04091             | PSPA7_0511                | PA0411                    | PFL_5824                  | Pmen_0406                 |                           |
| pilK    |                                                  | orf03310      | PLES_04101             | PSPA7_0512                | PA0412                    | -                         | Pmen_0407                 |                           |
|         |                                                  | phzA1         | orf02989               | PLES_07171                | PSPA7_0888                | PA4210                    | -                         | -                         |
|         |                                                  | phzA2         | orf00499               | PLES_34251                | PSPA7_3385                | PA1899                    | -                         | -                         |
|         |                                                  | phzB1         | orf02990               | PLES_07161                | PSPA7_0888                | PA4211                    | -                         | -                         |
|         |                                                  | phzB2         | orf00500               | PLES_34241                | PSPA7_3384                | PA1900                    | -                         | -                         |
|         |                                                  | phzC1         | orf00501; orf02991     | PLES_07151                | PSPA7_0887                | PA4212                    | -                         | -                         |
|         |                                                  | phzC2         | -                      | PLES_34231                | PSPA7_3383                | PA1901                    | -                         | -                         |

| VFclass                   | Virulence factors          | Related genes | Y148<br>(Prediction)   | P.aeruginosa<br>LESB58    | P.aeruginosa<br>PA7       | P.aeruginosa<br>PAO1      | P.fluorescens<br>Pf-5     | P.mendocina<br>ymp        |
|---------------------------|----------------------------|---------------|------------------------|---------------------------|---------------------------|---------------------------|---------------------------|---------------------------|
|                           |                            |               | contig_1<br>(contig_1) | chromosome<br>(NC_011770) | chromosome<br>(NC_009656) | chromosome<br>(NC_002516) | chromosome<br>(NC_004129) | chromosome<br>(NC_009439) |
| Antimicrobial<br>activity | Phenazines<br>biosynthesis | phzD1         | orf00502; orf02992     | PLES_07141                | PSPA7_0886                | PA4213                    | -                         | -                         |
|                           |                            | phzD2         | -                      | PLES_34221                | PSPA7_3382                | PA1902                    | -                         | -                         |
|                           |                            | phzE1         | orf00503; orf02993     | PLES_07131                | PSPA7_0885                | PA4214                    | -                         | -                         |
|                           |                            | phzE2         | -                      | PLES_34211                | PSPA7_3381                | PA1903                    | -                         | -                         |
|                           |                            | phzF1         | orf00504; orf02994     | PLES_07121                | PSPA7_0884                | PA4215                    | -                         | -                         |
|                           |                            | phzF2         | -                      | PLES_34201                | PSPA7_3380                | PA1904                    | -                         | -                         |
|                           |                            | phzG1         | -                      | PLES_07111                | PSPA7_0883                | PA4216                    | -                         | -                         |
|                           |                            | phzG2         | orf00505; orf02995     | PLES_34191                | PSPA7_3379                | PA1905                    | -                         | -                         |
|                           |                            | phzH          | orf03684               | PLES_00521                | -                         | PA0051                    | -                         | -                         |
|                           |                            | phzM          | orf02987               | PLES_07181                | PSPA7_0889                | PA4209                    | -                         | -                         |
| phzS                      | orf02996                   | PLES_07101    | PSPA7_0881             | PA4217                    | -                         | -                         |                           |                           |
| Antiphagocytosis          | Alginate<br>biosynthesis   | alg44         | orf02257               | PLES_14911                | PSPA7_1603                | PA3542                    | PFL_1022                  | Pmen_1029                 |
|                           |                            | alg8          | orf02256               | PLES_14921                | PSPA7_1604                | PA3541                    | PFL_1023                  | Pmen_1030                 |
|                           |                            | algA          | orf02267               | PLES_14821                | PSPA7_1594                | PA3551                    | PFL_1013                  | Pmen_1020                 |
|                           |                            | algC          | orf04010               | PLES_57171                | PSPA7_6098                | PA5322                    | PFL_6054                  | Pmen_4379                 |
|                           |                            | algD          | orf02255               | PLES_14931                | PSPA7_1605                | PA3540                    | PFL_1024                  | Pmen_1031                 |
|                           |                            | algE          | orf02259               | PLES_14891                | PSPA7_1601                | PA3544                    | PFL_1020                  | Pmen_1027                 |
|                           |                            | algF          | orf02266               | PLES_14831                | PSPA7_1595                | PA3550                    | PFL_1014                  | Pmen_1021                 |
|                           |                            | algG          | orf02260               | PLES_14881                | PSPA7_1600                | PA3545                    | PFL_1019                  | Pmen_1026                 |
|                           |                            | algI          | orf02264               | PLES_14851                | PSPA7_1597                | PA3548                    | PFL_1016                  | Pmen_1023                 |
|                           |                            | algJ          | orf02265               | PLES_14841                | PSPA7_1596                | PA3549                    | PFL_1015                  | Pmen_1022                 |
|                           | algK                       | orf02258      | PLES_14901             | PSPA7_1602                | PA3543                    | PFL_1021                  | Pmen_1028                 |                           |
|                           | algL                       | orf02262      | PLES_14861             | PSPA7_1598                | PA3547                    | PFL_1017                  | Pmen_1024                 |                           |
|                           | algX                       | orf02261      | PLES_14871             | PSPA7_1599                | PA3546                    | PFL_1018                  | Pmen_1025                 |                           |
|                           | Alginate regulation        | algP/algR3    | orf04082               | PLES_56471                | PSPA7_5998                | PA5253                    | PFL_5995                  | Pmen_0287                 |
|                           |                            | algQ          | orf04079               | PLES_56491                | PSPA7_6001                | PA5255                    | PFL_5997                  | Pmen_0285                 |
|                           |                            | algR          | orf04073               | PLES_56551                | PSPA7_6007                | PA5261                    | PFL_6003                  | Pmen_0279                 |
|                           |                            | algU          | orf05206               | PLES_45811                | PSPA7_4757                | PA0762                    | PFL_1448                  | Pmen_1467                 |
|                           |                            | algW          | orf04933               | PLES_48251                | PSPA7_5018                | PA4446                    | PFL_0933                  | Pmen_0888                 |
|                           |                            | algZ          | orf04072               | PLES_56561                | PSPA7_6008                | PA5262                    | -                         | Pmen_0278                 |
|                           |                            | mucA          | orf05207               | PLES_45801                | PSPA7_4756                | PA0763                    | PFL_1449                  | Pmen_1468                 |
| mucB                      |                            | orf05208      | PLES_45791             | PSPA7_4755                | PA0764                    | PFL_1450                  | Pmen_1469                 |                           |
| mucC                      |                            | orf05209      | PLES_45781             | PSPA7_4754                | PA0765                    | -                         | Pmen_1470                 |                           |
| mucD                      |                            | orf05210      | PLES_45771             | PSPA7_4753                | PA0766                    | PFL_1451                  | Pmen_1471                 |                           |
| mucE                      | orf02799                   | PLES_09431    | PSPA7_1072             | PA4033                    | -                         | -                         |                           |                           |
| mucP                      | orf02372                   | PLES_13861    | PSPA7_1490             | PA3649                    | PFL_1183                  | Pmen_3046                 |                           |                           |

| VFclass       | Virulence factors                        | Related genes | Y148<br>(Prediction)   | P.aeruginosa<br>LESB58                   | P.aeruginosa<br>PA7       | P.aeruginosa<br>PAO1      | P.fluorescens<br>Pf-5     | P.mendocina<br>ymp        |
|---------------|------------------------------------------|---------------|------------------------|------------------------------------------|---------------------------|---------------------------|---------------------------|---------------------------|
|               |                                          |               | contig_1<br>(contig_1) | chromosome<br>(NC_011770)                | chromosome<br>(NC_009656) | chromosome<br>(NC_002516) | chromosome<br>(NC_004129) | chromosome<br>(NC_009439) |
| Biosurfactant | Rhamnolipid biosynthesis                 | rhIA          | orf02214               | PLES_15331                               | PSPA7_1647                | PA3479                    | -                         | -                         |
|               |                                          | rhIB          | orf02213               | PLES_15341                               | PSPA7_1648                | PA3478                    | -                         | -                         |
|               |                                          | rhIC          | orf05719               | PLES_41891                               | -                         | PA1130                    | -                         | -                         |
| Enzyme        | Hemolytic phospholipase C                | plcH          | orf05294               | PLES_44741                               | PSPA7_4676                | PA0844                    | -                         | -                         |
|               | Non-hemolytic phospholipase C            | plcN          | orf02047               | PLES_17461                               | PSPA7_1801                | PA3319                    | PFL_3126                  | -                         |
|               | Phospholipase C                          | plcB          | orf03714               | PLES_00251                               | PSPA7_0027                | PA0026                    | -                         | -                         |
|               | Phospholipase D                          | pldA          | -                      | -                                        | -                         | PA3487                    | -                         | -                         |
|               | Achromobactin biosynthesis and transport | acsA          | -                      | -                                        | PSPA7_3092                | -                         | -                         | -                         |
|               |                                          | acsB          | -                      | -                                        | PSPA7_3089                | -                         | -                         | -                         |
|               |                                          | acsC          | -                      | -                                        | -                         | -                         | -                         | -                         |
|               |                                          | acsD          | -                      | -                                        | PSPA7_3094                | -                         | -                         | -                         |
|               |                                          | cbrA          | -                      | -                                        | -                         | -                         | -                         | -                         |
|               |                                          | cbrB          | -                      | -                                        | -                         | -                         | -                         | -                         |
|               |                                          | cbrC          | -                      | -                                        | -                         | -                         | -                         | -                         |
|               | cbrD                                     | -             | -                      | -                                        | -                         | -                         | -                         | -                         |
|               | Pyochelin receptor                       | fptA          | orf03000               | PLES_07061                               | PSPA7_0879                | PA4221                    | PFL_2293                  | -                         |
|               | Pyochelin                                | pchA          | orf03010               | PLES_06961                               | PSPA7_0869                | PA4231                    | PFL_3488                  | -                         |
|               |                                          | pchB          | orf03009               | PLES_06971                               | PSPA7_0870                | PA4230                    | PFL_3489                  | -                         |
|               |                                          | pchC          | orf03008               | PLES_06981                               | PSPA7_0871                | PA4229                    | PFL_3490                  | -                         |
|               |                                          | pchD          | orf03007               | PLES_06991                               | PSPA7_0872                | PA4228                    | PFL_3496                  | -                         |
|               |                                          | pchE          | orf03005               | PLES_07011                               | PSPA7_0874                | PA4226                    | PFL_3493                  | -                         |
|               |                                          | pchF          | orf03004               | PLES_07021                               | PSPA7_0875                | PA4225                    | PFL_3492                  | -                         |
|               |                                          | pchG          | orf03003               | PLES_07031                               | PSPA7_0876                | PA4224                    | -                         | -                         |
|               |                                          | pchH          | orf03002               | PLES_07041                               | PSPA7_0877                | PA4223                    | PFL_3495                  | -                         |
|               |                                          | pchI          | orf03001               | PLES_07051                               | PSPA7_0878                | PA4222                    | PFL_3494                  | -                         |
|               | pchR                                     | orf03006      | PLES_07001             | PSPA7_0873                               | PA4227                    | PFL_3497                  | -                         |                           |
|               | Pyoverdine receptors                     | fpvA          | orf01044               | PLES_28981;<br>PLES_29011;<br>PLES_29041 | PSPA7_2861                | PA2398                    | PFL_2391                  | Pmen_4556                 |
|               |                                          | pvdA          | orf01031               | PLES_29161                               | PSPA7_2874                | PA2386                    | PFL_4079                  | Pmen_2871                 |
|               | pvdD                                     | -             | PLES_28971             | -                                        | PA2399                    | PFL_4094                  | -                         |                           |

| VFclass        | Virulence factors               | Related genes | Y148<br>(Prediction)            | P.aeruginosa<br>LESB58                   | P.aeruginosa<br>PA7       | P.aeruginosa<br>PAO1      | P.fluorescens<br>Pf-5     | P.mendocina<br>ymp        |   |
|----------------|---------------------------------|---------------|---------------------------------|------------------------------------------|---------------------------|---------------------------|---------------------------|---------------------------|---|
|                |                                 |               | contig_1<br>(contig_1)          | chromosome<br>(NC_011770)                | chromosome<br>(NC_009656) | chromosome<br>(NC_002516) | chromosome<br>(NC_004129) | chromosome<br>(NC_009439) |   |
| Iron uptake    | Pyoverdine                      | pvdE          | orf01042                        | PLES_28991;<br>PLES_29021;<br>PLES_29051 | PSPA7_2862                | PA2397                    | PFL_4091                  | -                         |   |
|                |                                 | pvdF          | orf01041                        | PLES_29061                               | PSPA7_2863                | PA2396                    | PFL_4090                  | -                         |   |
|                |                                 | pvdG          | orf01081                        | PLES_28701                               | PSPA7_2828                | PA2425                    | -                         | -                         |   |
|                |                                 | pvdH          | orf01059                        | PLES_28831                               | PSPA7_2846                | PA2413                    | PFL_4179                  | Pmen_2868                 |   |
|                |                                 | pvdI          | orf01046; orf01047;<br>orf01264 | PLES_28951                               | PSPA7_2859                | PA2402                    | PFL_4093                  | -                         |   |
|                |                                 | pvdJ          | orf01045                        | PLES_28961                               | PSPA7_2860                | PA2400                    | -                         | -                         |   |
|                |                                 | pvdL          | orf01080                        | PLES_28711                               | PSPA7_2829                | PA2424                    | PFL_4189                  | -                         |   |
|                |                                 | pvdM          | orf01038                        | PLES_29091                               | PSPA7_2866                | PA2393                    | PFL_4087                  | -                         |   |
|                |                                 | pvdN          | orf01039                        | PLES_29081                               | PSPA7_2865                | PA2394                    | PFL_4088                  | -                         |   |
|                |                                 | pvdO          | orf01040                        | PLES_29071                               | PSPA7_2864                | PA2395                    | PFL_4089                  | -                         |   |
|                |                                 | pvdP          | orf01037                        | PLES_29101                               | PSPA7_2868                | PA2392                    | PFL_4086                  | -                         |   |
|                |                                 | pvdQ          | orf01030                        | PLES_29171                               | PSPA7_2876                | PA2385                    | PFL_2902                  | -                         |   |
|                | pvdS                            | orf01082      | PLES_28691                      | PSPA7_2827                               | PA2426                    | PFL_4190                  | Pmen_2873                 |                           |   |
|                | pvdY                            | orf01083      | PLES_28681                      | PSPA7_2826                               | PA2427                    | PFL_4191                  | -                         |                           |   |
|                | Yersiniabactin                  | fyuA          | -                               | -                                        | -                         | -                         | -                         | -                         | - |
|                |                                 | irp1          | -                               | -                                        | -                         | -                         | -                         | -                         | - |
|                |                                 | irp2          | -                               | -                                        | -                         | -                         | -                         | -                         | - |
|                |                                 | irp3          | -                               | -                                        | -                         | -                         | -                         | -                         | - |
|                |                                 | irp4          | -                               | -                                        | -                         | -                         | -                         | -                         | - |
|                |                                 | irp5          | -                               | -                                        | -                         | -                         | -                         | -                         | - |
| ybtA           |                                 | -             | -                               | -                                        | -                         | -                         | -                         | -                         |   |
| ybtP           |                                 | -             | -                               | -                                        | -                         | -                         | -                         | -                         |   |
| ybtQ           | -                               | -             | -                               | -                                        | -                         | -                         | -                         |                           |   |
| Protease       | Alkaline protease               | aprA          | orf05844                        | PLES_40631                               | PSPA7_4143                | PA1249                    | PFL_2483                  | -                         |   |
|                | Elastase                        | lasA          | orf00467                        | PLES_34521                               | PSPA7_3417                | PA1871                    | -                         | -                         |   |
|                |                                 | lasB          | orf02449                        | PLES_12581                               | PSPA7_1397                | PA3724                    | -                         | -                         |   |
|                | Protease IV                     | prpL          | orf02951                        | PLES_07521                               | PSPA7_0919                | PA4175                    | -                         | -                         |   |
| Quorum sensing | Acylhomoserine lactone synthase | hdtS          | orf03734                        | PLES_00041                               | PSPA7_0005                | PA0005                    | PFL_0011                  | Pmen_0011                 |   |
|                | N-(3-oxo-dodecanoyl)-L-         | lasI          | orf05928                        | PLES_39821                               | PSPA7_3897                | PA1432                    | -                         | -                         |   |
|                |                                 | lasR          | orf05926                        | PLES_39841                               | PSPA7_3898                | PA1430                    | -                         | -                         |   |
|                | N-(3-oxo-hexanoyl)-             | ahlI          | -                               | -                                        | -                         | -                         | -                         | -                         |   |
| ahlR           |                                 | -             | -                               | -                                        | -                         | -                         | -                         |                           |   |

| VFclass    | Virulence factors                                                | Related genes                | Y148<br>(Prediction)   | P.aeruginosa<br>LESB58    | P.aeruginosa<br>PA7       | P.aeruginosa<br>PAO1      | P.fluorescens<br>Pf-5     | P.mendocina<br>ymp        |
|------------|------------------------------------------------------------------|------------------------------|------------------------|---------------------------|---------------------------|---------------------------|---------------------------|---------------------------|
|            |                                                                  |                              | contig_1<br>(contig_1) | chromosome<br>(NC_011770) | chromosome<br>(NC_009656) | chromosome<br>(NC_002516) | chromosome<br>(NC_004129) | chromosome<br>(NC_009439) |
|            | N-(butanoyl)-L-homoserine                                        | rhlI                         | orf02211               | PLES_15361                | PSPA7_1650                | PA3476                    | -                         | -                         |
|            |                                                                  | rhlR                         | orf02212               | PLES_15351                | PSPA7_1649                | PA3477                    | -                         | -                         |
| Regulation | GacS/GacA two-component system                                   | gacA                         | orf01248               | PLES_26021                | PSPA7_2613                | PA2586                    | PFL_3563                  | Pmen_2375                 |
|            |                                                                  | gacS                         | orf05383               | PLES_43881                | PSPA7_4582                | PA0928                    | PFL_4451                  | Pmen_1730                 |
|            | Harpins                                                          | hopP1                        | -                      | -                         | -                         | -                         | -                         | -                         |
|            |                                                                  | hrpA1                        | -                      | -                         | -                         | -                         | -                         | -                         |
|            |                                                                  | hrpA2                        | -                      | -                         | -                         | -                         | -                         | -                         |
|            |                                                                  | hrpK1                        | -                      | -                         | -                         | -                         | -                         | -                         |
|            |                                                                  | hrpW1                        | -                      | -                         | -                         | -                         | -                         | -                         |
|            |                                                                  | hrpZ1                        | -                      | -                         | -                         | -                         | -                         | -                         |
|            | Hcp secretion island-1 encoded type VI secretion system (H-T6SS) | --                           | orf03665               | PLES_00721                | PSPA7_0142                | PA0071                    | PFL_6075                  | Pmen_2310                 |
|            |                                                                  | --                           | orf03664               | PLES_00731                | PSPA7_0143                | PA0072                    | PFL_6076                  | Pmen_2311                 |
|            |                                                                  | --                           | orf03663               | PLES_00741                | PSPA7_0144                | PA0073                    | PFL_6077                  | Pmen_2312                 |
|            |                                                                  | --                           | orf03660               | PLES_00771                | PSPA7_0147                | PA0076                    | PFL_6080                  | Pmen_2315                 |
|            |                                                                  | --                           | orf03658               | PLES_00791                | PSPA7_0149                | PA0078                    | PFL_6082                  | Pmen_2317                 |
|            |                                                                  | --                           | orf03657               | PLES_00801                | PSPA7_0150                | PA0079                    | PFL_6083                  | Pmen_2318                 |
|            |                                                                  | --                           | orf03656               | PLES_00811                | PSPA7_0151                | PA0080                    | PFL_6084                  | Pmen_2319                 |
|            |                                                                  | --                           | orf03653               | PLES_00831                | PSPA7_0154                | PA0082                    | PFL_6086                  | Pmen_2321                 |
|            |                                                                  | --                           | orf03652               | PLES_00841                | PSPA7_0155                | PA0083                    | PFL_6087                  | Pmen_2322                 |
|            |                                                                  | --                           | orf03651               | PLES_00851                | PSPA7_0156                | PA0084                    | PFL_6088                  | Pmen_2323                 |
|            |                                                                  | --                           | orf03649               | PLES_00871                | PSPA7_0158                | PA0086                    | -                         | Pmen_2327                 |
|            |                                                                  | --                           | orf03648               | PLES_00881                | PSPA7_0159                | PA0087                    | PFL_6090                  | Pmen_2328                 |
|            |                                                                  | --                           | orf03647               | PLES_00891                | PSPA7_0160                | PA0088                    | PFL_6091                  | Pmen_2329                 |
|            |                                                                  | --                           | orf03646               | PLES_00901                | PSPA7_0161                | PA0089                    | PFL_6092                  | Pmen_2330                 |
|            |                                                                  | clpV1                        | orf03645               | PLES_00911                | PSPA7_0162                | PA0090                    | PFL_6093                  | Pmen_2331                 |
|            |                                                                  | fha1                         | orf03655               | PLES_00821                | PSPA7_0152                | PA0081                    | PFL_6085                  | Pmen_2320                 |
|            |                                                                  | hcp1                         | orf03650               | PLES_00861                | PSPA7_0157                | PA0085                    | PFL_6089                  | Pmen_2324                 |
|            |                                                                  | icmF1                        | orf03659               | PLES_00781                | PSPA7_0148                | PA0077                    | PFL_6081                  | Pmen_2316                 |
|            |                                                                  | ppkA                         | orf03662               | PLES_00751                | PSPA7_0145                | PA0074                    | PFL_6078                  | Pmen_2313                 |
|            | pppA                                                             | orf03661                     | PLES_00761             | PSPA7_0146                | PA0075                    | PFL_6079                  | Pmen_2314                 |                           |
|            | vgrG1                                                            | orf01367; orf03640; orf03644 | PLES_00921             | PSPA7_0163                | PA0091                    | PFL_6094                  | -                         |                           |
|            | P. aeruginosa TTSS translocated effectors                        | exoS                         | orf02583               | PLES_11331                | -                         | PA3841                    | -                         | -                         |
| exoT       |                                                                  | orf03692                     | PLES_00451             | -                         | PA0044                    | -                         | -                         |                           |
| exoU       |                                                                  | -                            | -                      | -                         | -                         | -                         | -                         |                           |
| exoY       |                                                                  | orf00804                     | PLES_31341             | -                         | PA2191                    | -                         | -                         |                           |

| VFclass | Virulence factors | Related genes | Y148<br>(Prediction)   | P.aeruginosa<br>LESB58    | P.aeruginosa<br>PA7       | P.aeruginosa<br>PAO1      | P.fluorescens<br>Pf-5     | P.mendocina<br>ymp        |
|---------|-------------------|---------------|------------------------|---------------------------|---------------------------|---------------------------|---------------------------|---------------------------|
|         |                   |               | contig_1<br>(contig_1) | chromosome<br>(NC_011770) | chromosome<br>(NC_009656) | chromosome<br>(NC_002516) | chromosome<br>(NC_004129) | chromosome<br>(NC_009439) |
|         |                   | exsA          | orf00298               | PLES_36161                | -                         | PA1713                    | -                         | -                         |
|         |                   | exsB          | orf00297               | PLES_36171                | -                         | PA1712                    | -                         | -                         |
|         |                   | exsC          | orf00295               | PLES_36181                | -                         | PA1710                    | -                         | -                         |
|         |                   | exsD          | orf00299               | PLES_36151                | -                         | PA1714                    | -                         | -                         |
|         |                   | exsE          | orf00296               | -                         | -                         | PA1711                    | -                         | -                         |
|         |                   | pcr1          | orf00284               | PLES_36281                | -                         | PA1699                    | -                         | -                         |
|         |                   | pcr2          | orf00285               | PLES_36271                | -                         | PA1700                    | -                         | -                         |
|         |                   | pcr3          | orf00286               | PLES_36261                | -                         | PA1701                    | -                         | -                         |
|         |                   | pcr4          | orf00287               | PLES_36251                | -                         | PA1702                    | -                         | -                         |
|         |                   | pcrD          | orf00288               | PLES_36241                | -                         | PA1703                    | -                         | -                         |
|         |                   | pcrG          | orf00290               | PLES_36221                | -                         | PA1705                    | -                         | -                         |
|         |                   | pcrH          | orf00292               | -                         | -                         | PA1707                    | -                         | -                         |
|         |                   | pcrR          | orf00289               | PLES_36231                | -                         | PA1704                    | -                         | -                         |
|         |                   | pcrV          | orf00291               | PLES_36211                | -                         | PA1706                    | -                         | -                         |
|         |                   | popB          | orf00293               | PLES_36201                | -                         | PA1708                    | -                         | -                         |
|         |                   | popD          | orf00294               | PLES_36191                | -                         | PA1709                    | -                         | -                         |
|         |                   | popN          | orf00283               | PLES_36291                | -                         | PA1698                    | -                         | -                         |
|         |                   | pscB          | orf00300               | PLES_36141                | -                         | PA1715                    | -                         | -                         |
|         |                   | pscC          | orf00301               | PLES_36131                | -                         | PA1716                    | -                         | -                         |
|         |                   | pscD          | orf00302               | PLES_36121                | -                         | PA1717                    | -                         | -                         |
|         |                   | pscE          | -                      | PLES_36111                | -                         | PA1718                    | -                         | -                         |
|         |                   | pscF          | orf00303               | PLES_36101                | -                         | PA1719                    | -                         | -                         |
|         |                   | pscG          | orf00304               | PLES_36091                | -                         | PA1720                    | -                         | -                         |
|         |                   | pscH          | orf00305               | PLES_36081                | -                         | PA1721                    | -                         | -                         |
|         |                   | pscl          | orf00306               | PLES_36071                | -                         | PA1722                    | -                         | -                         |
|         |                   | pscJ          | orf00307               | PLES_36061                | -                         | PA1723                    | -                         | -                         |
|         |                   | pscK          | orf00308               | PLES_36051                | -                         | PA1724                    | -                         | -                         |
|         |                   | pscL          | orf00309               | PLES_36041                | -                         | PA1725                    | -                         | -                         |
|         |                   | pscN          | orf00282               | PLES_36301                | -                         | PA1697                    | -                         | -                         |
|         |                   | pscO          | orf00280               | PLES_36311                | -                         | PA1696                    | -                         | -                         |
|         |                   | pscP          | orf00281               | -                         | -                         | PA1695                    | -                         | -                         |
|         |                   | pscQ          | orf00278               | PLES_36321                | -                         | PA1694                    | -                         | -                         |
|         |                   | pscR          | orf00279               | PLES_36331                | -                         | PA1693                    | -                         | -                         |
|         |                   | pscS          | orf00277               | PLES_36341                | -                         | PA1692                    | -                         | -                         |
|         |                   | pscT          | orf00276               | PLES_36351                | -                         | PA1691                    | -                         | -                         |
|         |                   | pscU          | orf00275               | PLES_36361                | -                         | PA1690                    | -                         | -                         |

| VFclass             | Virulence factors | Related genes | Y148<br>(Prediction)   | P.aeruginosa<br>LESB58    | P.aeruginosa<br>PA7       | P.aeruginosa<br>PAO1      | P.fluorescens<br>Pf-5     | P.mendocina<br>ymp        |
|---------------------|-------------------|---------------|------------------------|---------------------------|---------------------------|---------------------------|---------------------------|---------------------------|
|                     |                   |               | contig_1<br>(contig_1) | chromosome<br>(NC_011770) | chromosome<br>(NC_009656) | chromosome<br>(NC_002516) | chromosome<br>(NC_004129) | chromosome<br>(NC_009439) |
| Secretion<br>system |                   | avrB2         | -                      | -                         | -                         | -                         | -                         | -                         |
|                     |                   | avrB3         | -                      | -                         | -                         | -                         | -                         | -                         |
|                     |                   | avrB4-1       | -                      | -                         | -                         | -                         | -                         | -                         |
|                     |                   | avrB4-2       | -                      | -                         | -                         | -                         | -                         | -                         |
|                     |                   | avrD1         | -                      | -                         | -                         | -                         | -                         | -                         |
|                     |                   | avrE1         | -                      | -                         | -                         | -                         | -                         | -                         |
|                     |                   | avrPto1       | -                      | -                         | -                         | -                         | -                         | -                         |
|                     |                   | avrRpm1       | -                      | -                         | -                         | -                         | -                         | -                         |
|                     |                   | avrRps4       | -                      | -                         | -                         | -                         | -                         | -                         |
|                     |                   | hopA1         | -                      | -                         | -                         | -                         | -                         | -                         |
|                     |                   | hopAA1'       | -                      | -                         | -                         | -                         | -                         | -                         |
|                     |                   | hopAA1-1      | -                      | -                         | -                         | -                         | -                         | -                         |
|                     |                   | hopAA1-2      | -                      | -                         | -                         | -                         | -                         | -                         |
|                     |                   | hopAA1        | -                      | -                         | -                         | -                         | -                         | -                         |
|                     |                   | hopAB1        | -                      | -                         | -                         | -                         | -                         | -                         |
|                     |                   | hopAB2        | -                      | -                         | -                         | -                         | -                         | -                         |
|                     |                   | hopAB3'       | -                      | -                         | -                         | -                         | -                         | -                         |
|                     |                   | hopAC1        | -                      | -                         | -                         | -                         | -                         | -                         |
|                     |                   | hopAC         | -                      | -                         | -                         | -                         | -                         | -                         |
|                     |                   | hopAD1        | -                      | -                         | -                         | -                         | -                         | -                         |
|                     |                   | hopAE1        | -                      | -                         | -                         | -                         | -                         | -                         |
|                     |                   | hopAF1        | -                      | -                         | -                         | -                         | -                         | -                         |
|                     |                   | hopAG1        | -                      | -                         | -                         | -                         | -                         | -                         |
|                     |                   | hopAG         | -                      | -                         | -                         | -                         | -                         | -                         |
|                     |                   | hopAH1        | -                      | -                         | -                         | -                         | -                         | -                         |
|                     |                   | hopAH2-1      | -                      | -                         | -                         | -                         | -                         | -                         |
|                     |                   | hopAH2-2      | -                      | -                         | -                         | -                         | -                         | -                         |
|                     |                   | hopAH2        | -                      | -                         | -                         | -                         | -                         | -                         |
|                     |                   | hopA11'       | -                      | -                         | -                         | -                         | -                         | -                         |
|                     |                   | hopA11        | -                      | -                         | -                         | -                         | -                         | -                         |
|                     |                   | hopAJ1        | -                      | -                         | -                         | -                         | -                         | -                         |
|                     |                   | hopAJ2        | -                      | -                         | -                         | -                         | -                         | -                         |
|                     |                   | hopAK1        | -                      | -                         | -                         | -                         | -                         | -                         |
|                     | hopAM1-1          | -             | -                      | -                         | -                         | -                         | -                         |                           |
|                     | hopAM1-2          | -             | -                      | -                         | -                         | -                         | -                         |                           |
|                     | hopAN1            | -             | -                      | -                         | -                         | -                         | -                         |                           |

| VFclass | Virulence factors             | Related genes | Y148<br>(Prediction)   | P.aeruginosa<br>LESB58    | P.aeruginosa<br>PA7       | P.aeruginosa<br>PAO1      | P.fluorescens<br>Pf-5     | P.mendocina<br>ymp        |
|---------|-------------------------------|---------------|------------------------|---------------------------|---------------------------|---------------------------|---------------------------|---------------------------|
|         |                               |               | contig_1<br>(contig_1) | chromosome<br>(NC_011770) | chromosome<br>(NC_009656) | chromosome<br>(NC_002516) | chromosome<br>(NC_004129) | chromosome<br>(NC_009439) |
|         | P. syringae TTSS<br>effectors | hopAO1        | -                      | -                         | -                         | -                         | -                         | -                         |
|         |                               | hopAP1        | -                      | -                         | -                         | -                         | -                         | -                         |
|         |                               | hopAQ1        | -                      | -                         | -                         | -                         | -                         | -                         |
|         |                               | hopAS1'       | -                      | -                         | -                         | -                         | -                         | -                         |
|         |                               | hopAS1        | -                      | -                         | -                         | -                         | -                         | -                         |
|         |                               | hopAT1'       | -                      | -                         | -                         | -                         | -                         | -                         |
|         |                               | hopAT1        | -                      | -                         | -                         | -                         | -                         | -                         |
|         |                               | hopAU1        | -                      | -                         | -                         | -                         | -                         | -                         |
|         |                               | hopAV1        | -                      | -                         | -                         | -                         | -                         | -                         |
|         |                               | hopAW1        | -                      | -                         | -                         | -                         | -                         | -                         |
|         |                               | hopB1         | -                      | -                         | -                         | -                         | -                         | -                         |
|         |                               | hopC1         | -                      | -                         | -                         | -                         | -                         | -                         |
|         |                               | hopD1         | -                      | -                         | -                         | -                         | -                         | -                         |
|         |                               | hopD          | -                      | -                         | -                         | -                         | -                         | -                         |
|         |                               | hopE1         | -                      | -                         | -                         | -                         | -                         | -                         |
|         |                               | hopF2         | -                      | -                         | -                         | -                         | -                         | -                         |
|         |                               | hopF3         | -                      | -                         | -                         | -                         | -                         | -                         |
|         |                               | hopG1         | -                      | -                         | -                         | -                         | -                         | -                         |
|         |                               | hopH1         | -                      | -                         | -                         | -                         | -                         | -                         |
|         |                               | hopI1         | -                      | -                         | -                         | -                         | -                         | -                         |
|         |                               | hopJ1         | -                      | -                         | -                         | -                         | -                         | -                         |
|         |                               | hopK1         | -                      | -                         | -                         | -                         | -                         | -                         |
|         |                               | hopL1         | -                      | -                         | -                         | -                         | -                         | -                         |
|         |                               | hopM1'        | -                      | -                         | -                         | -                         | -                         | -                         |
|         |                               | hopM1         | -                      | -                         | -                         | -                         | -                         | -                         |
|         |                               | hopN1         | -                      | -                         | -                         | -                         | -                         | -                         |
|         |                               | hopO1-1       | -                      | -                         | -                         | -                         | -                         | -                         |
|         |                               | hopO1-3'      | -                      | -                         | -                         | -                         | -                         | -                         |
|         |                               | hopP1-2       | -                      | -                         | -                         | -                         | -                         | -                         |
|         |                               | hopQ1-1       | -                      | -                         | -                         | -                         | -                         | -                         |
|         | hopQ1-2                       | -             | -                      | -                         | -                         | -                         | -                         |                           |
|         | hopQ1                         | -             | -                      | -                         | -                         | -                         | -                         |                           |
|         | hopR1                         | -             | -                      | -                         | -                         | -                         | -                         |                           |
|         | hopS1'                        | -             | -                      | -                         | -                         | -                         | -                         |                           |
|         | hopS2                         | -             | -                      | -                         | -                         | -                         | -                         |                           |
|         | hopT1-1                       | -             | -                      | -                         | -                         | -                         | -                         |                           |

| VFclass | Virulence factors | Related genes | Y148<br>(Prediction)   | P.aeruginosa<br>LESB58    | P.aeruginosa<br>PA7       | P.aeruginosa<br>PAO1      | P.fluorescens<br>Pf-5     | P.mendocina<br>ymp        |
|---------|-------------------|---------------|------------------------|---------------------------|---------------------------|---------------------------|---------------------------|---------------------------|
|         |                   |               | contig_1<br>(contig_1) | chromosome<br>(NC_011770) | chromosome<br>(NC_009656) | chromosome<br>(NC_002516) | chromosome<br>(NC_004129) | chromosome<br>(NC_009439) |
|         |                   | hopT1-2       | -                      | -                         | -                         | -                         | -                         | -                         |
|         |                   | hopT2         | -                      | -                         | -                         | -                         | -                         | -                         |
|         |                   | hopU1         | -                      | -                         | -                         | -                         | -                         | -                         |
|         |                   | hopV1         | -                      | -                         | -                         | -                         | -                         | -                         |
|         |                   | hopW1-1       | -                      | -                         | -                         | -                         | -                         | -                         |
|         |                   | hopW1-2       | -                      | -                         | -                         | -                         | -                         | -                         |
|         |                   | hopX1         | -                      | -                         | -                         | -                         | -                         | -                         |
|         |                   | hopY1         | -                      | -                         | -                         | -                         | -                         | -                         |
|         |                   | hopZ3         | -                      | -                         | -                         | -                         | -                         | -                         |
|         | P. syringae TTSS  | hrcC          | -                      | -                         | -                         | -                         | -                         | -                         |
|         |                   | hrcJ          | -                      | -                         | -                         | -                         | -                         | -                         |
|         |                   | hrcN          | -                      | -                         | -                         | -                         | -                         | -                         |
|         |                   | hrcQa         | -                      | -                         | -                         | -                         | -                         | -                         |
|         |                   | hrcQb         | -                      | -                         | -                         | -                         | -                         | -                         |
|         |                   | hrcR          | -                      | -                         | -                         | -                         | -                         | -                         |
|         |                   | hrcS          | -                      | -                         | -                         | -                         | -                         | -                         |
|         |                   | hrcT          | -                      | -                         | -                         | -                         | -                         | -                         |
|         |                   | hrcU          | -                      | -                         | -                         | -                         | -                         | -                         |
|         |                   | hrcV          | -                      | -                         | -                         | -                         | -                         | -                         |
|         |                   | hrpB          | -                      | -                         | -                         | -                         | -                         | -                         |
|         |                   | hrpD          | -                      | -                         | -                         | -                         | -                         | -                         |
|         |                   | hrpE          | -                      | -                         | -                         | -                         | -                         | -                         |
|         |                   | hrpF          | -                      | -                         | -                         | -                         | -                         | -                         |
|         |                   | hrpG          | -                      | -                         | -                         | -                         | -                         | -                         |
|         |                   | hrpJ          | -                      | -                         | -                         | -                         | -                         | -                         |
|         |                   | hrpL          | -                      | -                         | -                         | -                         | -                         | -                         |
|         |                   | hrpO          | -                      | -                         | -                         | -                         | -                         | -                         |
|         |                   | hrpP          | -                      | -                         | -                         | -                         | -                         | -                         |
|         |                   | hrpQ          | -                      | -                         | -                         | -                         | -                         | -                         |
|         |                   | hrpR          | -                      | -                         | -                         | -                         | -                         | -                         |
|         |                   | hrpS          | -                      | -                         | -                         | -                         | -                         | -                         |
|         |                   | hrpT          | -                      | -                         | -                         | -                         | -                         | -                         |
|         |                   | hrpV          | -                      | -                         | -                         | -                         | -                         | -                         |
|         | shcA              | -             | -                      | -                         | -                         | -                         | -                         |                           |
|         | shcE              | -             | -                      | -                         | -                         | -                         | -                         |                           |
|         | shcF              | -             | -                      | -                         | -                         | -                         | -                         |                           |

| VFclass | Virulence factors              | Related genes | Y148<br>(Prediction)   | P.aeruginosa<br>LESB58    | P.aeruginosa<br>PA7       | P.aeruginosa<br>PAO1      | P.fluorescens<br>Pf-5     | P.mendocina<br>ymp        |   |
|---------|--------------------------------|---------------|------------------------|---------------------------|---------------------------|---------------------------|---------------------------|---------------------------|---|
|         |                                |               | contig_1<br>(contig_1) | chromosome<br>(NC_011770) | chromosome<br>(NC_009656) | chromosome<br>(NC_002516) | chromosome<br>(NC_004129) | chromosome<br>(NC_009439) |   |
| Toxin   |                                | shcM          | -                      | -                         | -                         | -                         | -                         | -                         |   |
|         |                                | shcN          | -                      | -                         | -                         | -                         | -                         | -                         |   |
|         |                                | shcS1         | -                      | -                         | -                         | -                         | -                         | -                         |   |
|         |                                | shcS2         | -                      | -                         | -                         | -                         | -                         | -                         |   |
|         |                                | shcV          | -                      | -                         | -                         | -                         | -                         | -                         |   |
|         | Exolysin                       | exlA          | -                      | -                         | PSPA7_4642                | -                         | PFL_4237*                 | -                         |   |
|         |                                | exlB          | -                      | -                         | PSPA7_4641                | -                         | PFL_4236                  | -                         |   |
|         | Exotoxin A (ETA)               | toxA          | orf05739               | PLES_41711                | -                         | PA1148                    | -                         | -                         |   |
|         | Hydrogen cyanide<br>production | hcnA          | orf00806               | PLES_31321                | PSPA7_3103                | PA2193                    | PFL_2577                  | -                         |   |
|         |                                | hcnB          | orf00807               | PLES_31311                | PSPA7_3102                | PA2194                    | PFL_2578                  | -                         |   |
|         |                                | hcnC          | orf00808               | PLES_31301                | PSPA7_3101                | PA2195                    | PFL_2579                  | -                         |   |
|         | Phytotoxin<br>coronatine       | --            | -                      | -                         | -                         | -                         | -                         | -                         | - |
|         |                                | cfa1          | -                      | -                         | -                         | -                         | -                         | -                         | - |
|         |                                | cfa2          | -                      | -                         | -                         | -                         | -                         | -                         | - |
|         |                                | cfa3          | -                      | -                         | -                         | -                         | -                         | -                         | - |
|         |                                | cfa4          | -                      | -                         | -                         | -                         | -                         | -                         | - |
|         |                                | cfa5          | -                      | -                         | -                         | -                         | -                         | -                         | - |
|         |                                | cfa6          | -                      | -                         | -                         | -                         | -                         | -                         | - |
|         |                                | cfa7          | -                      | -                         | -                         | -                         | -                         | -                         | - |
|         |                                | cfa8          | -                      | -                         | -                         | -                         | -                         | -                         | - |
| cfa9    |                                | -             | -                      | -                         | -                         | -                         | -                         | -                         |   |
| cfl     |                                | -             | -                      | -                         | -                         | -                         | -                         | -                         |   |
| cmaA    |                                | -             | -                      | -                         | -                         | -                         | -                         | -                         |   |
| cmaB    |                                | -             | -                      | -                         | -                         | -                         | -                         | -                         |   |
| cmaC    |                                | -             | -                      | -                         | -                         | -                         | -                         | -                         |   |
| cmaD    |                                | -             | -                      | -                         | -                         | -                         | -                         | -                         |   |
| cmaE    | -                              | -             | -                      | -                         | -                         | -                         | -                         |                           |   |
| cmaT    | -                              | -             | -                      | -                         | -                         | -                         | -                         |                           |   |
| cmaU    | -                              | -             | -                      | -                         | -                         | -                         | -                         |                           |   |
| corP    | -                              | -             | -                      | -                         | -                         | -                         | -                         |                           |   |
| corR    | -                              | -             | -                      | -                         | -                         | -                         | -                         |                           |   |
|         | --                             | -             | -                      | -                         | -                         | -                         | -                         | -                         |   |
|         | --                             | -             | -                      | -                         | -                         | -                         | -                         | -                         |   |
|         | --                             | -             | -                      | -                         | -                         | -                         | -                         | -                         |   |
|         | --                             | -             | -                      | -                         | -                         | -                         | -                         | -                         |   |

| VFclass                                                                                                                | Virulence factors                | Related genes | Y148<br>(Prediction)   | P.aeruginosa<br>LESB58    | P.aeruginosa<br>PA7       | P.aeruginosa<br>PAO1      | P.fluorescens<br>Pf-5     | P.mendocina<br>ymp        |
|------------------------------------------------------------------------------------------------------------------------|----------------------------------|---------------|------------------------|---------------------------|---------------------------|---------------------------|---------------------------|---------------------------|
|                                                                                                                        |                                  |               | contig_1<br>(contig_1) | chromosome<br>(NC_011770) | chromosome<br>(NC_009656) | chromosome<br>(NC_002516) | chromosome<br>(NC_004129) | chromosome<br>(NC_009439) |
|                                                                                                                        | Phytotoxin<br>phaseolotoxin      | --            | -                      | -                         | -                         | -                         | -                         | -                         |
|                                                                                                                        |                                  | --            | -                      | -                         | -                         | -                         | -                         | -                         |
|                                                                                                                        |                                  | --            | -                      | -                         | -                         | -                         | -                         | -                         |
|                                                                                                                        |                                  | --            | -                      | -                         | -                         | -                         | -                         | -                         |
|                                                                                                                        |                                  | --            | -                      | -                         | -                         | -                         | -                         | -                         |
|                                                                                                                        |                                  | --            | -                      | -                         | -                         | -                         | -                         | -                         |
|                                                                                                                        |                                  | --            | -                      | -                         | -                         | -                         | -                         | -                         |
|                                                                                                                        |                                  | --            | -                      | -                         | -                         | -                         | -                         | -                         |
|                                                                                                                        |                                  | --            | -                      | -                         | -                         | -                         | -                         | -                         |
|                                                                                                                        |                                  | --            | -                      | -                         | -                         | -                         | -                         | -                         |
|                                                                                                                        |                                  | --            | -                      | -                         | -                         | -                         | -                         | -                         |
|                                                                                                                        |                                  | --            | -                      | -                         | -                         | -                         | -                         | -                         |
|                                                                                                                        |                                  | argD          | -                      | -                         | -                         | -                         | -                         | -                         |
|                                                                                                                        | argK                             | -             | -                      | -                         | -                         | -                         | -                         |                           |
|                                                                                                                        | cysC1                            | -             | -                      | -                         | -                         | -                         | -                         |                           |
|                                                                                                                        | dcd2                             | -             | -                      | -                         | -                         | -                         | -                         |                           |
|                                                                                                                        | Phytotoxin<br>syringomycin       | syrB1         | -                      | -                         | -                         | -                         | -                         | -                         |
|                                                                                                                        |                                  | syrB2         | -                      | -                         | -                         | -                         | -                         | -                         |
|                                                                                                                        |                                  | syrC          | -                      | -                         | -                         | -                         | -                         | -                         |
|                                                                                                                        |                                  | syrD          | -                      | -                         | -                         | -                         | -                         | -                         |
|                                                                                                                        |                                  | syrE          | -                      | -                         | -                         | -                         | -                         | -                         |
|                                                                                                                        |                                  | syrF          | -                      | -                         | -                         | -                         | -                         | -                         |
|                                                                                                                        | syrP                             | -             | -                      | -                         | -                         | -                         | -                         |                           |
|                                                                                                                        | Phytotoxin<br>syringopeptin      | sypA          | -                      | -                         | -                         | -                         | -                         | -                         |
|                                                                                                                        |                                  | sypB          | -                      | -                         | -                         | -                         | -                         | -                         |
|                                                                                                                        |                                  | sypC          | -                      | -                         | -                         | -                         | -                         | -                         |
|                                                                                                                        | TccC-type<br>insecticidal toxins | --            | -                      | -                         | -                         | -                         | -                         |                           |
| Table saved from VFDB ( <a href="http://www.mgc.ac.cn/VFs/">http://www.mgc.ac.cn/VFs/</a> ) [Tue Jul 22 08:53:24 2025] |                                  |               |                        |                           |                           |                           |                           |                           |

Note : Strains LESB58, PA7, PAO1, Pf-5 and ymp are the reference strains in the VFDB database.

**Table 2 Annotation of virulence factors in Y148 based on the VFDB database.**

| Protein id | Contig id | Start | Stop  | Strand | Element symbol | Element name                                                       | Scope | Type | Subtype | Class          | Subclass        | Method   | Target length | Reference sequence length | % Coverage of reference | % Identity to reference | Alignment length | Closest reference accession | Closest reference name                                             | HMM accession | HMM description |
|------------|-----------|-------|-------|--------|----------------|--------------------------------------------------------------------|-------|------|---------|----------------|-----------------|----------|---------------|---------------------------|-------------------------|-------------------------|------------------|-----------------------------|--------------------------------------------------------------------|---------------|-----------------|
| NA         | contig_1  | 3E+06 | 3E+06 | +      | blaPDC-3       | extended-spectrum class C beta-lactamase PDC-3                     | core  | AMR  | AMR     | BETA-LACTAM    | CEPHALOSPORIN   | ALL ELEX | 397           | 397                       | 100                     | 100                     | 397              | WP_003121934.1              | extended-spectrum class C beta-lactamase PDC-3                     | NA            | NA              |
| NA         | contig_1  | 3E+06 | 3E+06 | -      | aph(3')-IIb    | aminoglycoside O-phosphotransferase APH(3')-                       | core  | AMR  | AMR     | AMINOGLYCOSIDE | KANAMYCIN       | BLASTX   | 268           | 268                       | 100                     | 99.25                   | 268              | WP_003113011.1              | aminoglycoside O-phosphotransferase APH(3')-                       | NA            | NA              |
| NA         | contig_1  | 4E+06 | 4E+06 | -      | blaOXA-904     | OXA-50 family oxacillin-hydrolyzing class D beta-lactamase OXA-904 | core  | AMR  | AMR     | BETA-LACTAM    | BETA-LACTAM     | ALL ELEX | 262           | 262                       | 100                     | 100                     | 262              | WP_003122322.1              | OXA-50 family oxacillin-hydrolyzing class D beta-lactamase OXA-904 | NA            | NA              |
| NA         | contig_1  | 6E+06 | 6E+06 | -      | catB7          | type B-4 chloramphenicol O-acetyltransferase                       | core  | AMR  | AMR     | PHENICOL       | CHLORAMPHENICOL | BLASTX   | 212           | 212                       | 100                     | 98.58                   | 212              | WP_003112709.1              | type B-4 chloramphenicol O-acetyltransferase                       | NA            | NA              |
| NA         | contig_1  | 6E+06 | 6E+06 | -      | oprD_V359L     | Pseudomonas aeruginosa carbapenem resistant OprD                   | core  | AMR  | POINT   | BETA-LACTAM    | CARBAPENEM      | POINTX   | 441           | 443                       | 100                     | 94.58                   | 443              | WP_003112576.1              | outer membrane porin OprD                                          | NA            | NA              |
| NA         | contig_1  | 6E+06 | 6E+06 | +      | fosA           | FosA family fosfomycin resistance glutathion                       | core  | AMR  | AMR     | FOSFOMYCIN     | FOSFOMYCIN      | EXACTX   | 135           | 135                       | 100                     | 100                     | 135              | WP_003082280.1              | FosA family fosfomycin resistance glutathione transferase          | NA            | NA              |
